# Supplementary material
Source: PubMed Central journal article supplement (PMC4573277)

### AUC

Lambda=0.94216 SE=2.7009e-05

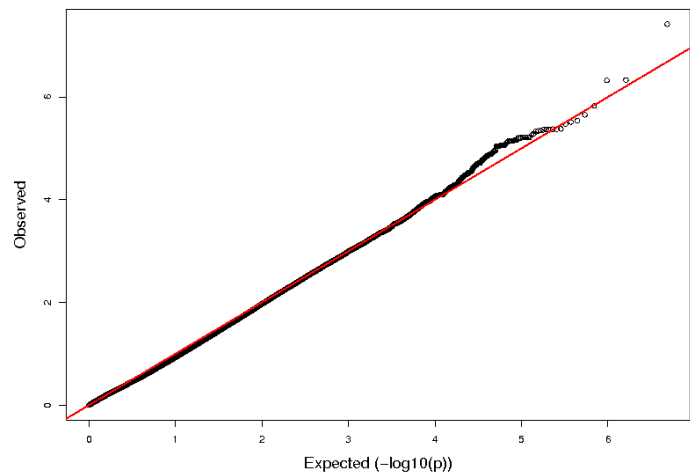

### AUI

Lambda=0.89253 SE=3.0223e-05

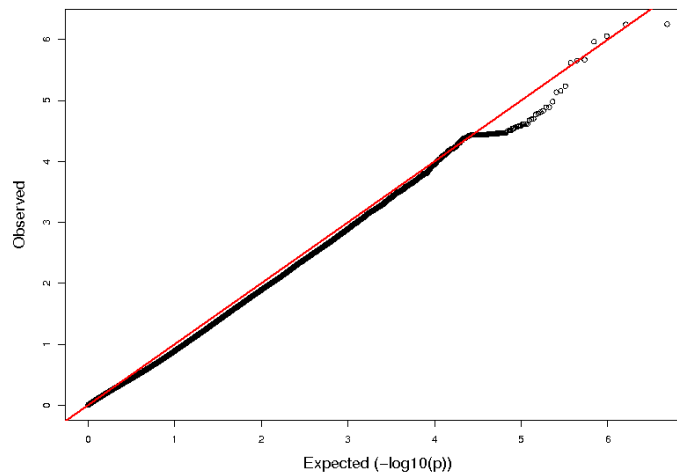

### Uptake

Lambda=0.88439 SE=2.7751e-05

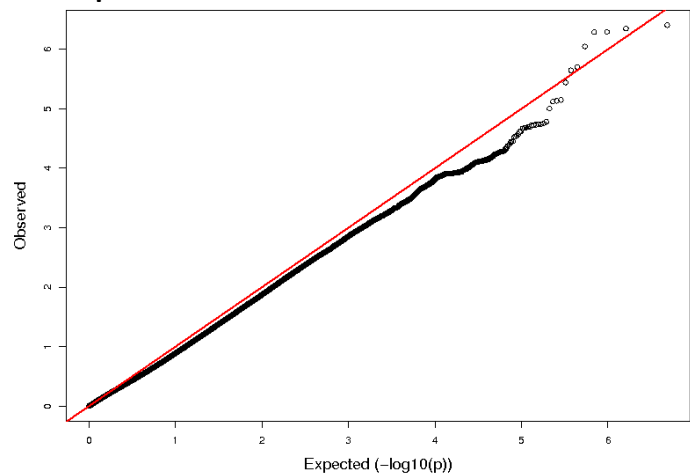

### Clearance

Lambda=0.8991 SE=3.0932e-05

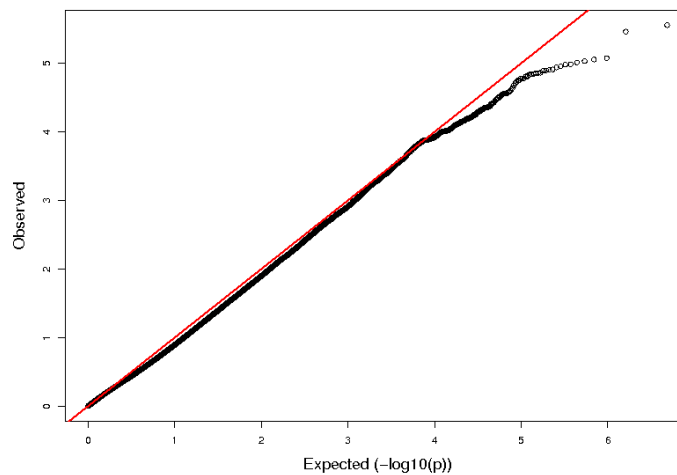

Supplement: NIHMS714082-supplement-1.pdf [file NIHMS714082-supplement-1.pdf]

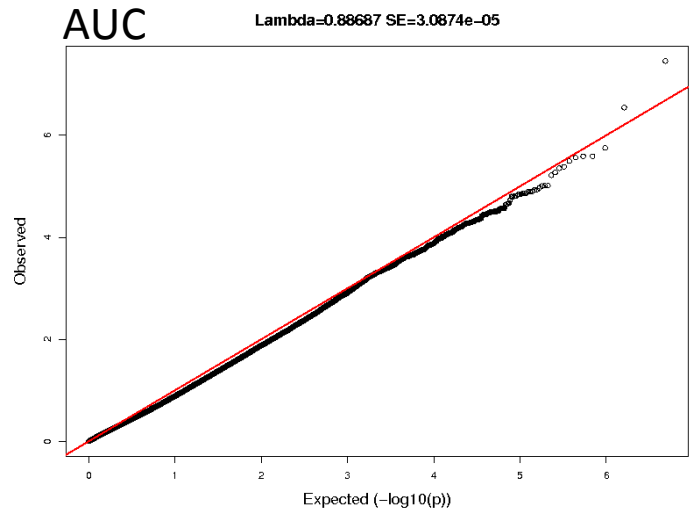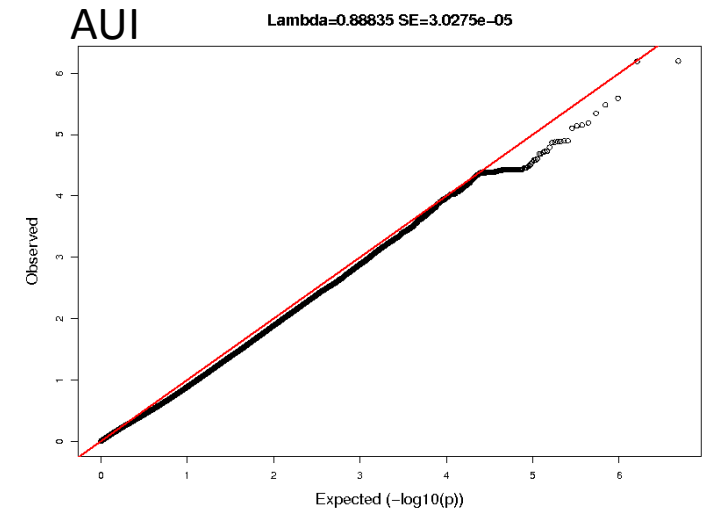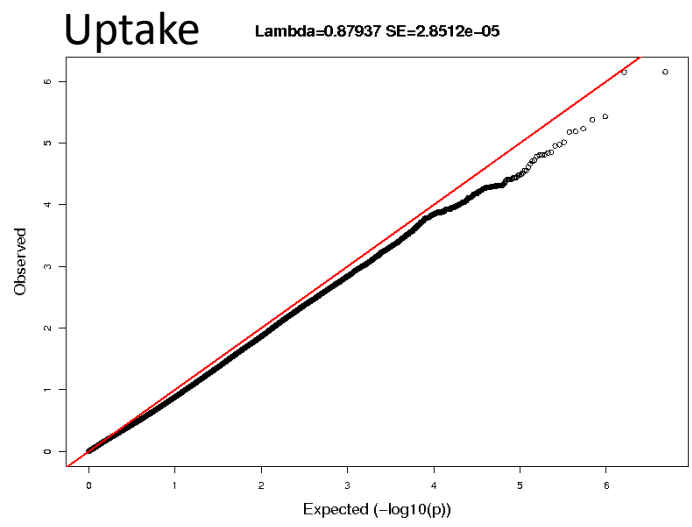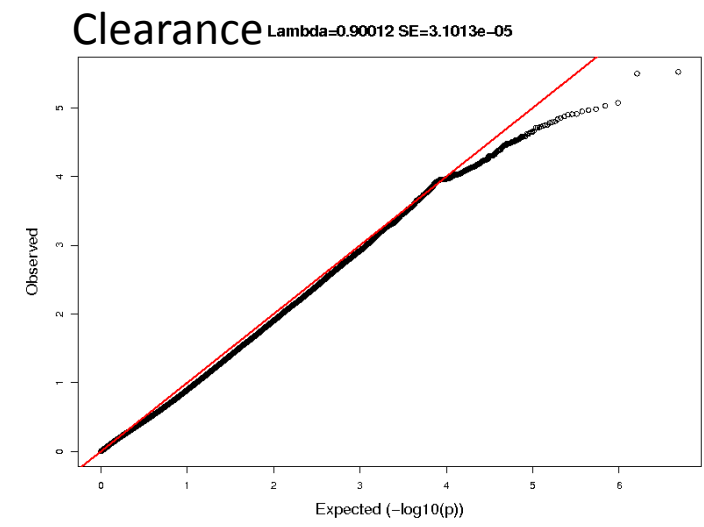

Supplement: NIHMS714082-supplement-2.pdf [file NIHMS714082-supplement-2.pdf]

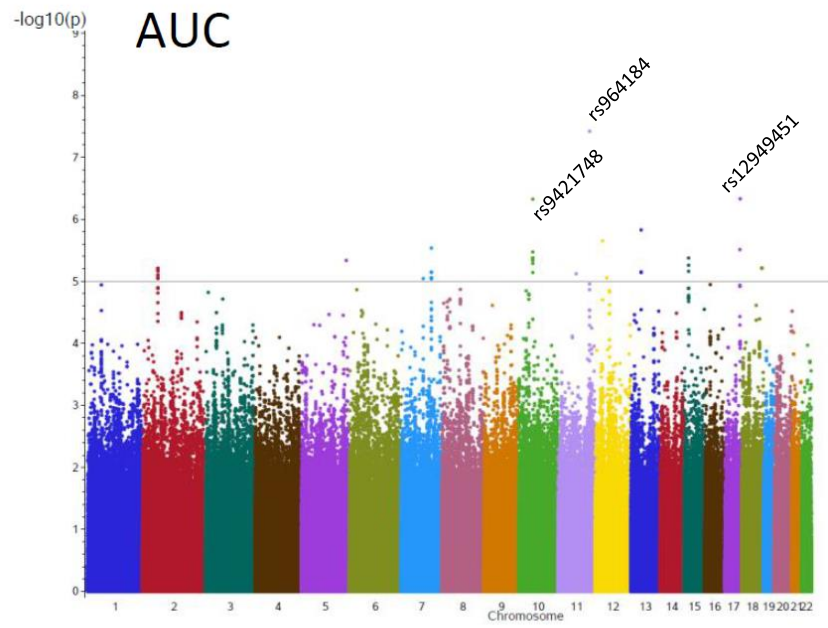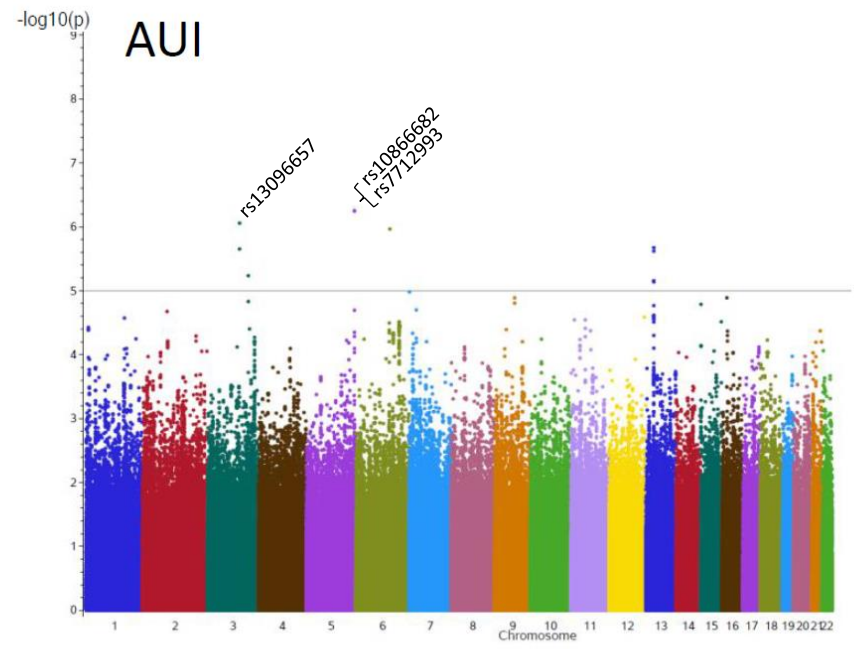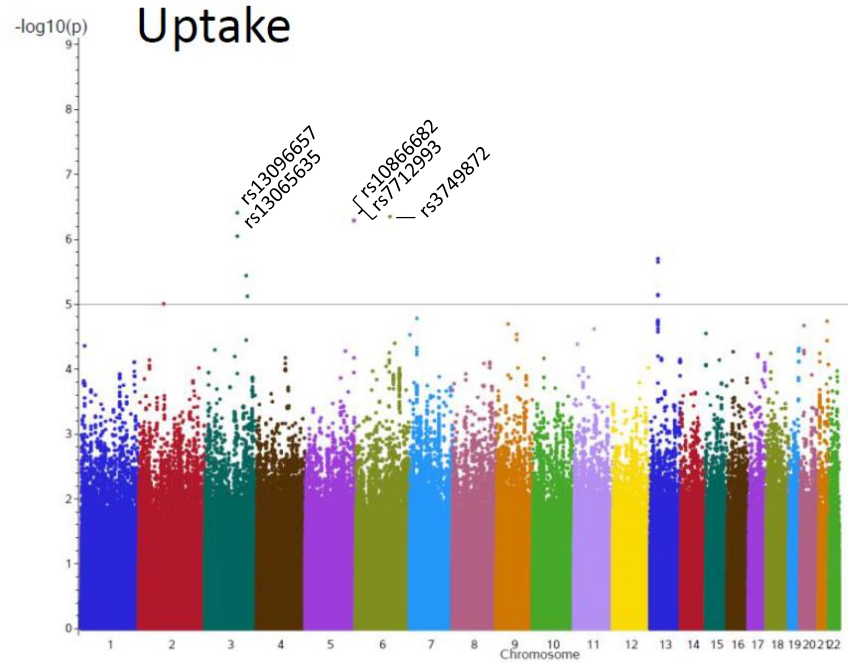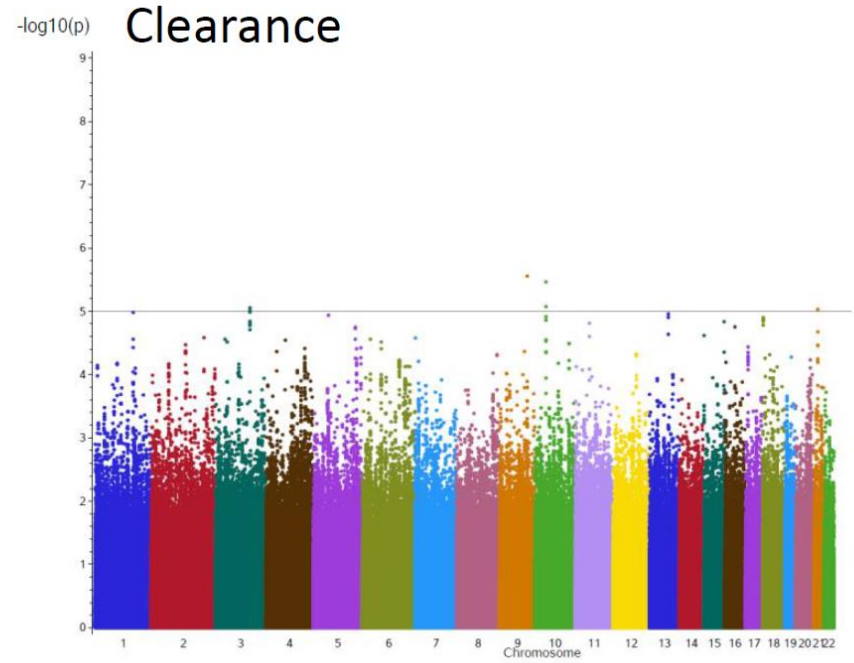

Supplement: NIHMS714082-supplement-3.pdf [file NIHMS714082-supplement-3.pdf]

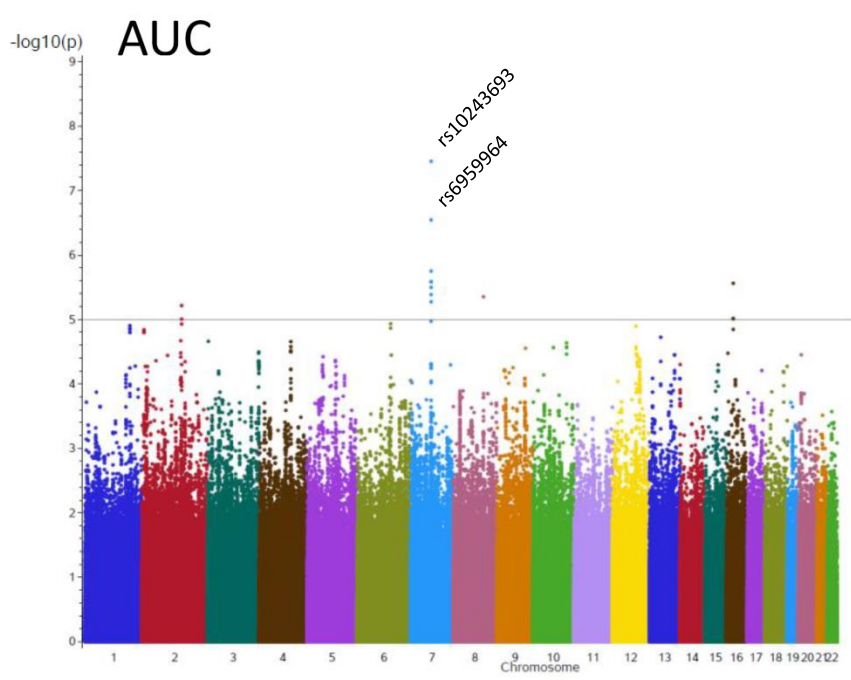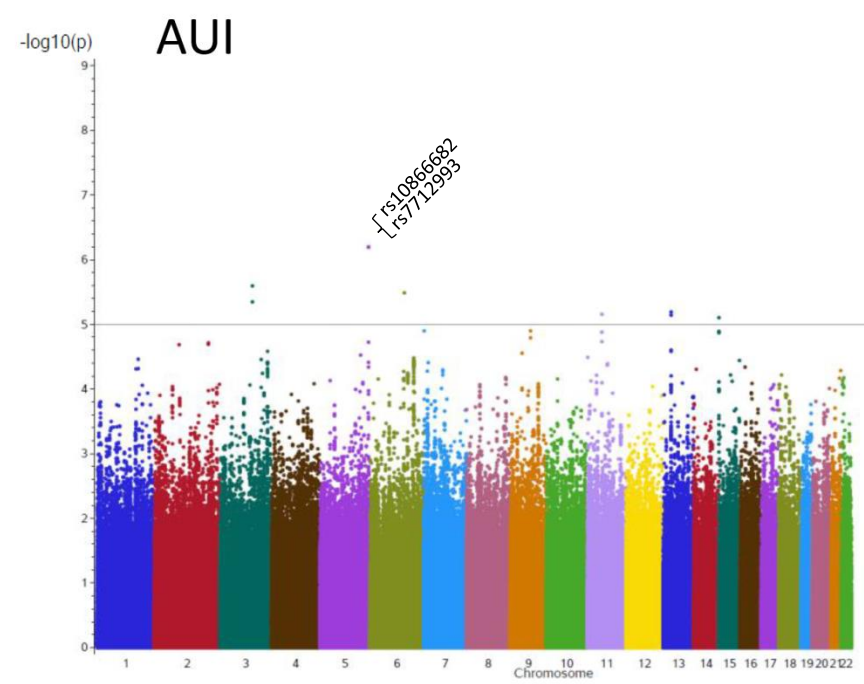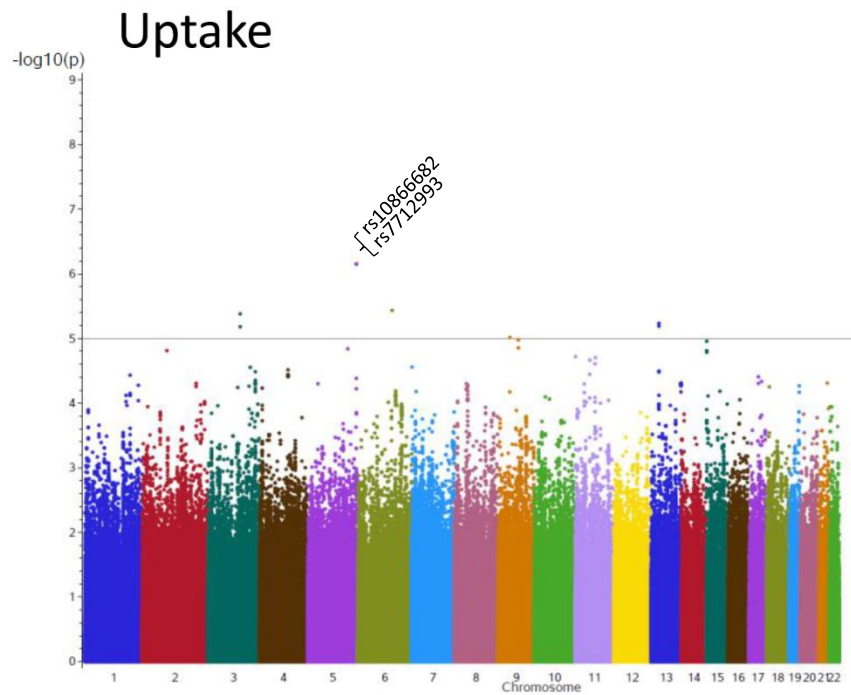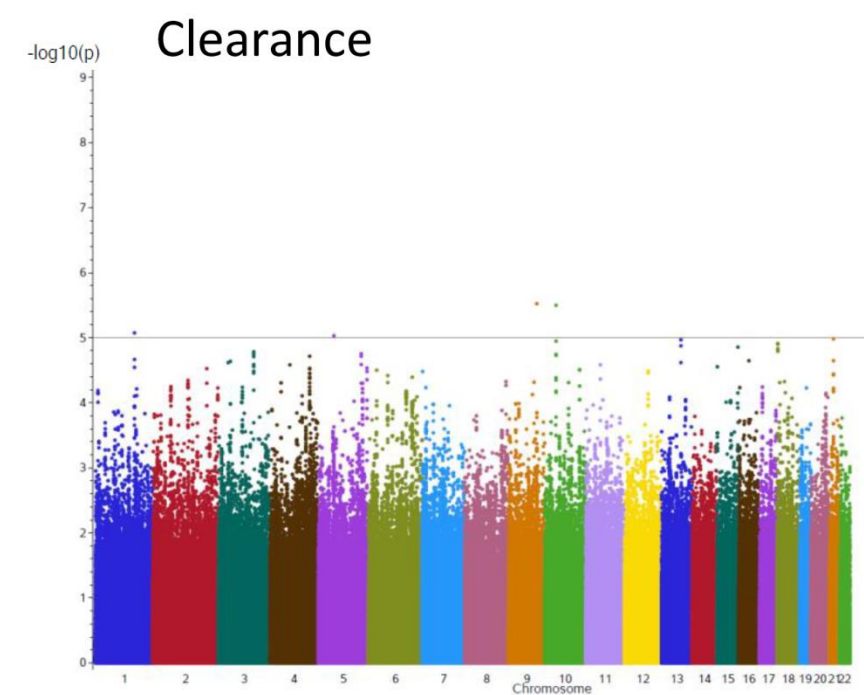

Supplement: NIHMS714082-supplement-4.pdf [file NIHMS714082-supplement-4.pdf]
